# Supplementary material for: miR-205-5p Downregulation and ZEB1 Upregulation Characterize the Disseminated Tumor Cells in Patients with Invasive Ductal Breast Cancer
Source: MDPI journal article supplement (doi:10.3390/ijms23010103), 2021-12-22
Supplement: s1 [file s1]

**Table S1.** Significant correlations between mRNA expressions of *CDH1* and EMT genes in different types of BC patient's samples

| Sample   | Gene          | Gene          | Correlation coefficient (r) | P-value |
|----------|---------------|---------------|-----------------------------|---------|
| C-breast | <i>TWIST1</i> | <i>SNAI2</i>  | 0.710                       | 0.049   |
|          |               | <i>ZEB2</i>   | 0.830                       | 0.011   |
|          | <i>SNAI2</i>  | <i>CDH1</i>   | 0.995                       | 0.005   |
|          | <i>ZEB1</i>   | <i>SNAI2</i>  | 0.818                       | 0.024   |
|          | <i>ZEB2</i>   | <i>SNAI2</i>  | 0.776                       | 0.005   |
|          |               | <i>ZEB1</i>   | 0.847                       | 0.016   |
| TU-C     | <i>TWIST1</i> | <i>CDH1</i>   | 0.468                       | 0.018   |
|          |               | <i>SNAI1</i>  | 0.493                       | 0.009   |
|          | <i>ZEB1</i>   | <i>SNAI1</i>  | 0.568                       | 0.005   |
|          |               | <i>SNAI2</i>  | 0.553                       | 0.005   |
|          | <i>ZEB2</i>   | <i>SNAI1</i>  | 0.587                       | 0.002   |
|          |               | <i>SNAI2</i>  | 0.775                       | < 0.000 |
| TU-IF    | <i>SNAI2</i>  | <i>SNAI1</i>  | 0.479                       | 0.013   |
|          |               | <i>CDH1</i>   | 0.430                       | 0.046   |
|          |               | <i>SNAI1</i>  | 0.500                       | 0.021   |
|          |               | <i>SNAI2</i>  | 0.672                       | <0.000  |
|          | <i>ZEB2</i>   | <i>TWIST1</i> | 0.426                       | 0.034   |
|          |               | <i>SNAI1</i>  | 0.431                       | 0.032   |
| LNM      |               | <i>SNAI2</i>  | 0.579                       | 0.002   |
|          |               | <i>ZEB1</i>   | 0.462                       | 0.027   |
|          | <i>TWIST1</i> | <i>SNAI2</i>  | 0.831                       | 0.002   |
|          |               | <i>CDH1</i>   | 0.683                       | 0.007   |
|          | <i>ZEB1</i>   | <i>TWIST1</i> | 0.686                       | 0.041   |
|          |               | <i>SNAI1</i>  | 0.628                       | 0.038   |
| C-blood  |               | <i>SNAI2</i>  | 0.725                       | 0.008   |
|          |               | <i>SNAI1</i>  | 0.958                       | 0.010   |
|          | <i>TWIST1</i> | <i>SNAI1</i>  | 0.981                       | 0.001   |
|          |               | <i>SNAI1</i>  | 0.840                       | 0.009   |
|          | <i>ZEB2</i>   | <i>TWIST1</i> | 0.947                       | 0.004   |
|          |               | <i>SNAI1</i>  | 0.831                       | 0.011   |
| CTC-     | <i>ZEB2</i>   | <i>ZEB1</i>   | 0.940                       | < 0.000 |
|          |               | <i>ZEB1</i>   | 0.607                       | 0.010   |
| CTC+     | <i>ZEB1</i>   | <i>SNAI1</i>  | 0.798                       | 0.002   |

Abbreviations: C-breast, non-neoplastic breast tissue controls; TU-C, tumor central region, TU-IF, tumor invasive front; LNM, lymph node metastasis; C-blood, CD45-depleted blood fractions from healthy women; CTC- and CTC+, CD45-depleted blood fractions from patients without and with identified epithelial and mesenchymal markers, respectively.
